# Supplementary material
Source: publisher figshare collection journal article supplement (https://acs.figshare.com/ndownloader/files/5138020)
Supplement: Supplementary file 1 [file 5138020]

## SUPPORTING INFORMATION

### List of Figures and Tables

**Fig. S1:** A general scheme of construction, replication and analysis of the control and modified vector.

**Fig. S2:** HPLC profile and PAGE analysis of the 2,7-DAM-dG-N7 adduct-containing decamer after heating at 90° C for 1, 2, and 3 min (chromatograms 3, 4, and 5, respectively, on the right; lanes 3, 4, and 5, respectively, in the autoradiogram on the left).

**Fig. S3:** HPLC tracings of **10-13** (purity control).

**Fig. S4:** HPLC of the digests of **10-13** (shows the adduct **7** or **8**).

**Fig. S5:** HPLC tracings of adducted templates **14**, **15** and **16** as tests for their purity.

**Fig. S6:** PAGE assay of purity of **14**, **15**, **16**.

**Fig. S7a:** PAGE analysis of primer extension on 2,7-DAM-adducted (**8**) template of complex **19** by Klenow (exo-) DNA polymerase at 37°C. Reaction conditions: Same as in Figure 4c, except the reaction temperature was 37° instead 25°.

**Fig S7b:** Primer extension on 2,7-DAM-adducted (**8**) templates by T7 (exo-) DNA polymerase. Same conditions as in Figure 5c. Complex **18** was used instead of complex **19** in Figure 5.

**Fig S8:** PAGE analysis of primer extension on 2,7-DAM-adducted (**8**) template of complex **19** by T7 exo<sup>-</sup>, Klenow exo<sup>-</sup> and eta DNA polymerases.

**Table S1:** Mass of oligonucleotides determined by ESIMS (-).

**Figure S1:**

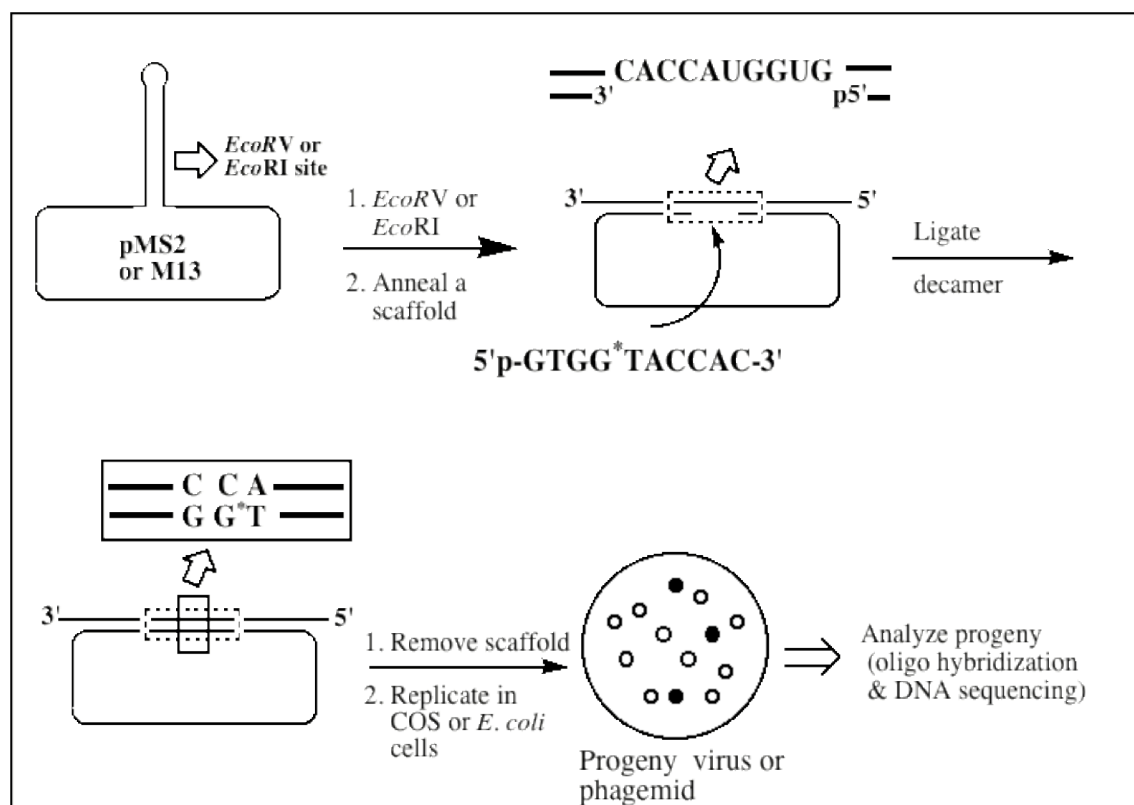

**Fig. S1:** A general scheme of construction, replication and analysis of the control and modified vector.

**Figure S2:** HPLC Profile and PAGE analysis of the 2,7-DAM-dG-N7 adduct (**8**)-containing decamer after heating at 90° C for 1, 2, and 3 min (chromatograms 3, 4, 5, respectively, on the right, and lanes 3, 4, and 5, respectively, in the autoradiogram on the left).

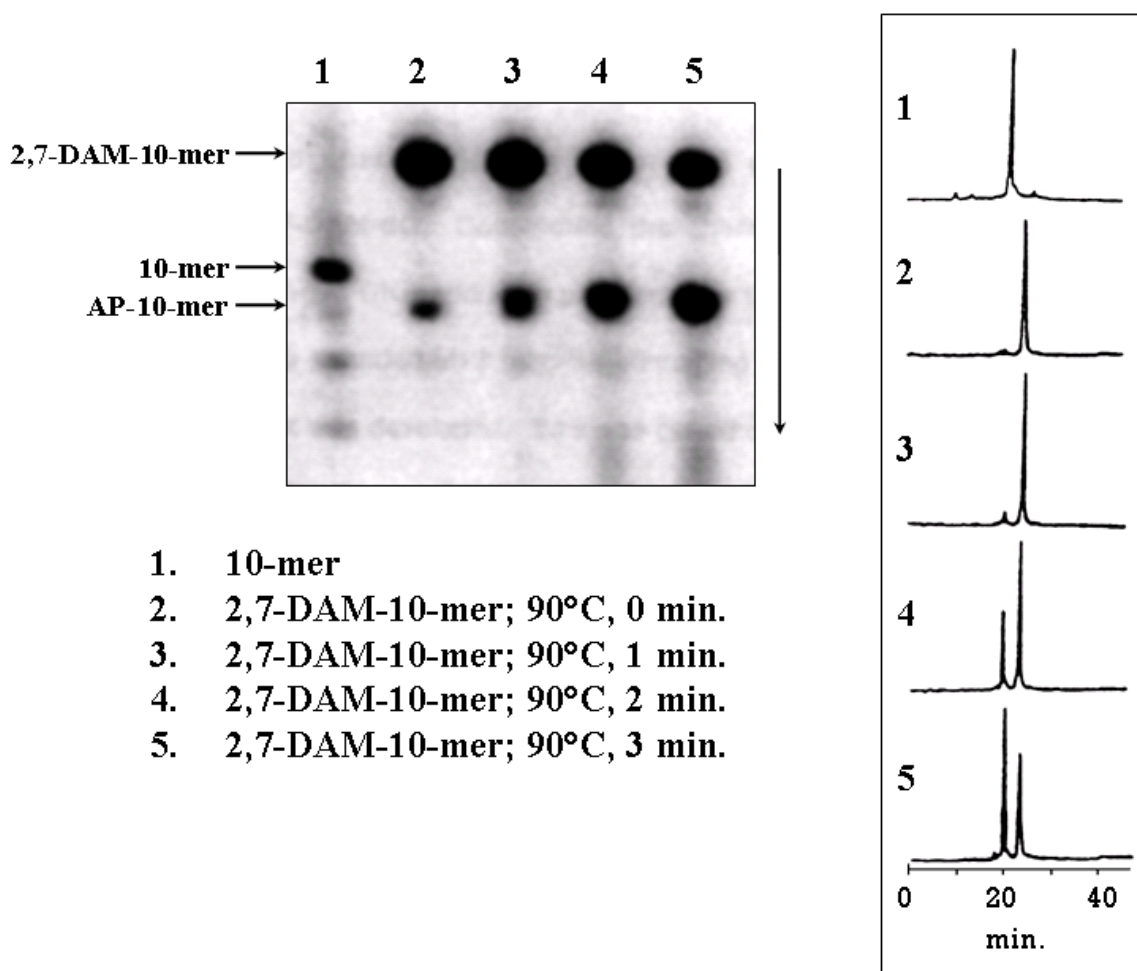

**Fig. S3:** HPLC tracings of **10-13** (purity). The HPLC were run on a C18 column, 100 Å, using a gradient of 5%-60% buffer B (70% 30 mM potassium phosphate and 30 % acetonitrile, pH 5.5) over 75 minutes. Buffer A has 100 % 30 mM potassium phosphate, pH 5.5, at 1ml/min flow rate.

HPLC trace MC-adducted (7) oligo **10**

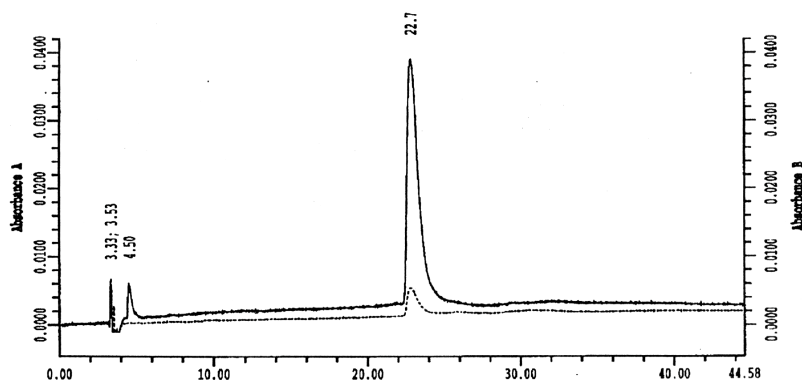

HPLC trace 2,7-DAM-adducted (8) oligo **12**

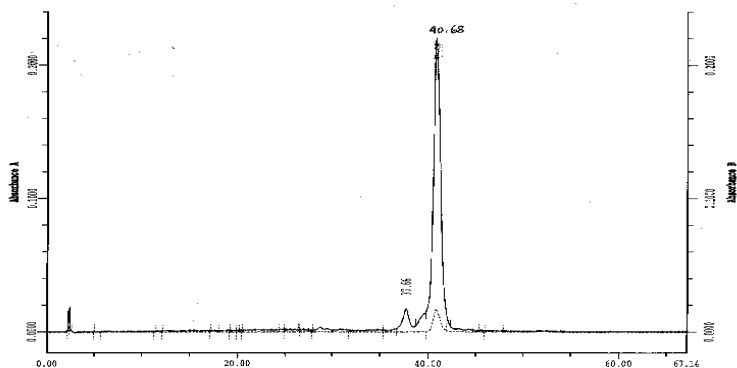

HPLC trace 2,7-DAM-adducted (8) oligo **13**

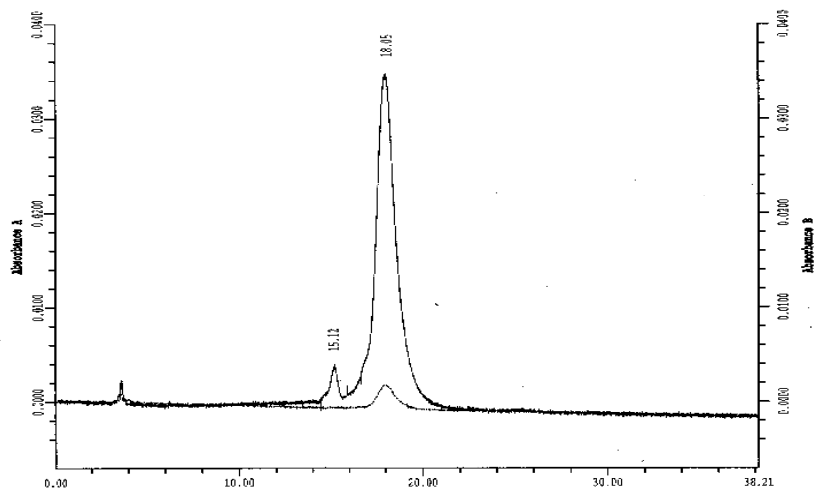

**Fig. S4:** HPLC of the [SVD + alkaline phosphatase] digests of **10-13** (shows adduct **7** or **8**).

**a)** HPLC of the digest of **10**.

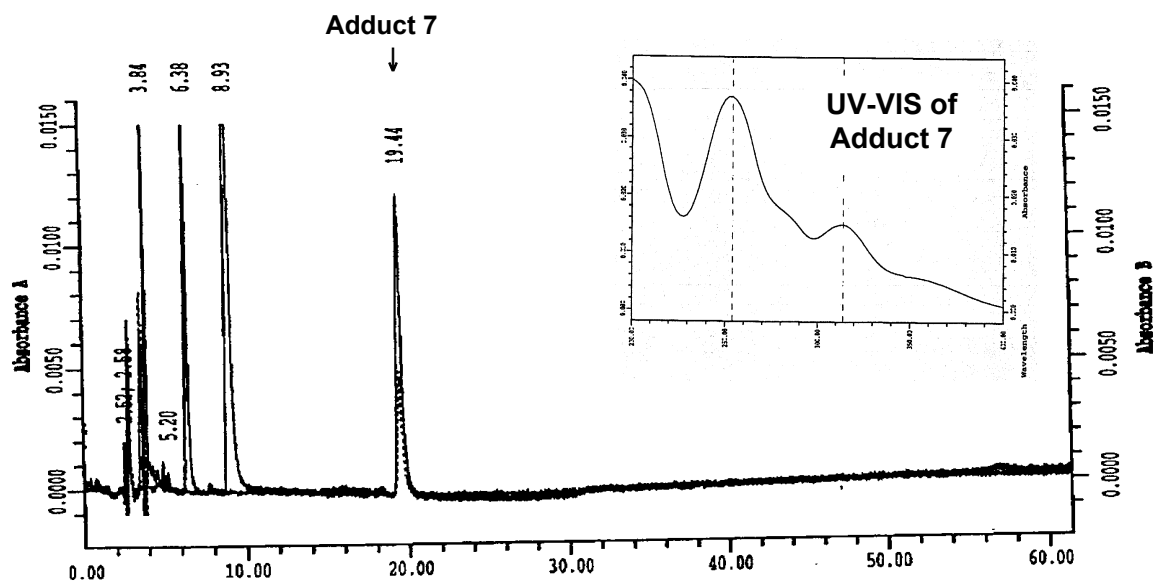

**b)** HPLC of the digest of **12** and **13**.

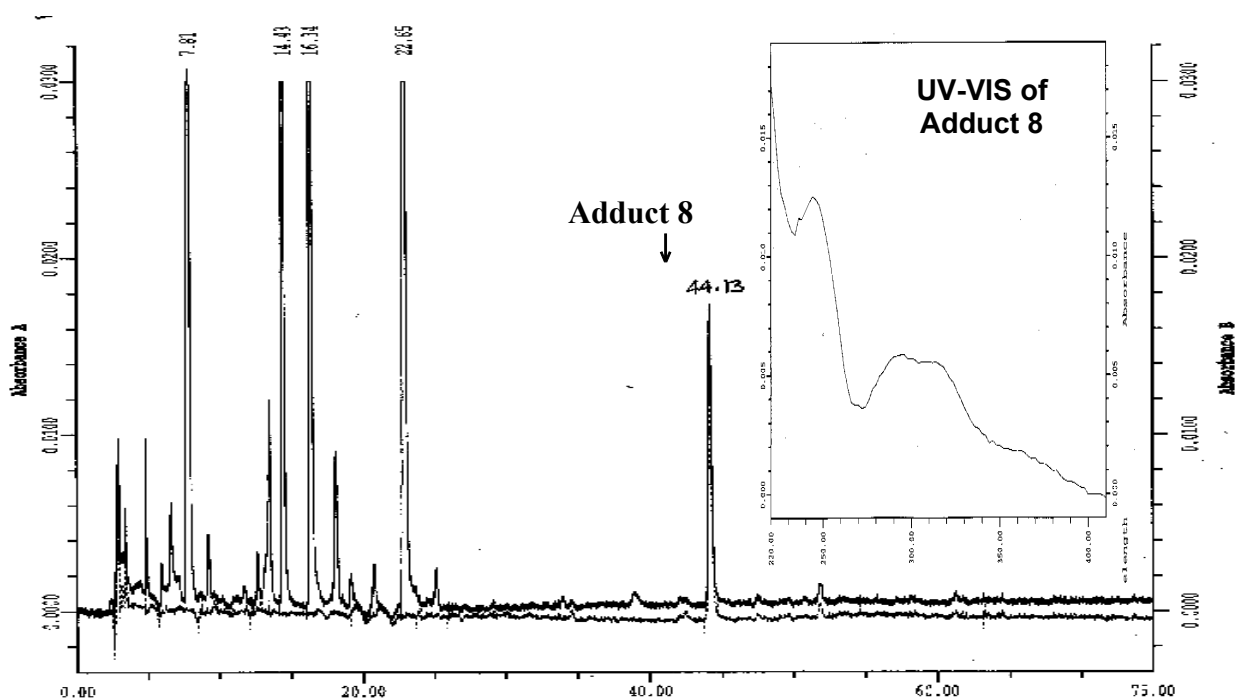

**Method:** Adducted oligonucleotides **10-13** were digested with snake venom phosphodiesterase (SVD) and alkaline phosphatase and subjected to HPLC analysis of nucleoside pattern. In the case of MC-adduct **7** a gradient of 20%-60% buffer B (30% acetonitrile in 30 mM phosphate buffer, pH 5.5) was run over 60 minutes on a C18 column, 100 Å, 1ml/min flow rate. In the case of 2,7-DAM-adduct **8**, the digested oligonucleotides **12-13** were depurinated at 90 °C, 1 hour and 30 minutes after which the nucleoside pattern was analyzed on a C18 column, 100 Å at 1ml/min flow rate using the same buffer system as for MC-adduct **7** but a gradient of 5%-60% buffer B over 75 min.

**Fig. S5.** HPLC tracings of adducted templates **14** and **15** as tests for their purity (the HPLC trace for template **16** is not available).

**HPLC trace of template 15:**

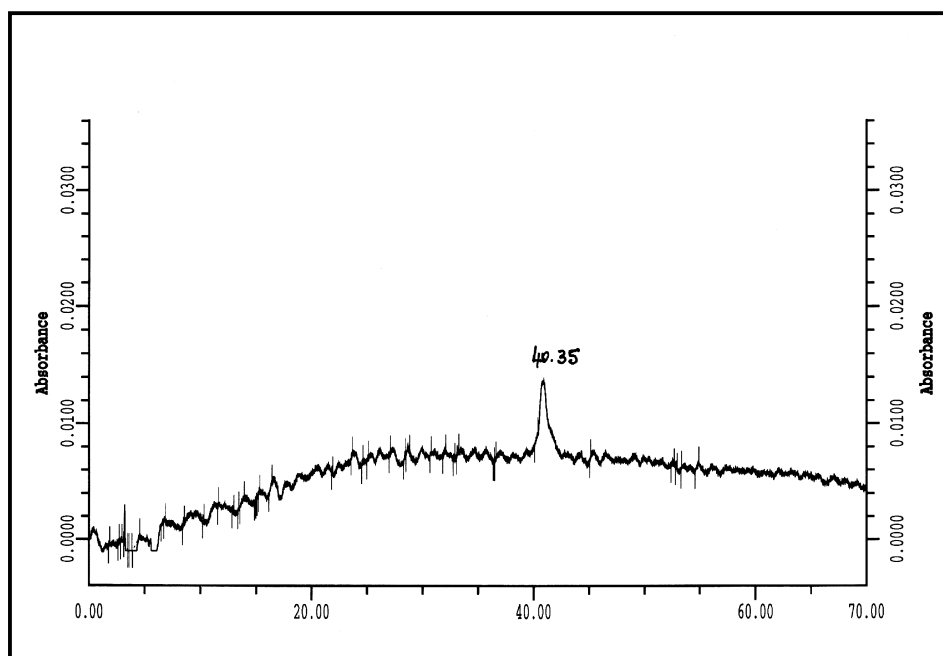

HPLC Trace of template **14**:

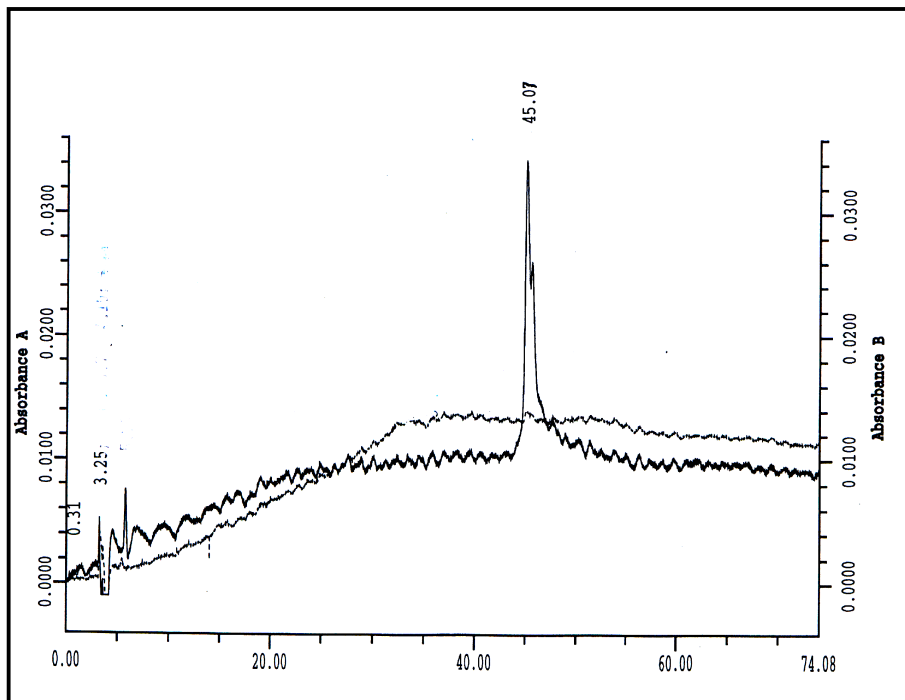

**Method:** Adducted templates were run on a C4 column, 300 Å, using a gradient of 20%-60% buffer B (30% acetonitrile into 30 mM potassium phosphate, pH 5.5), at 1 ml/min over 60 minutes. Buffer A has 100% 30 mM potassium phosphate buffer, pH 5.5.

**Fig. S6:** PAGE assay of purity of **14**, **15**, **16**.

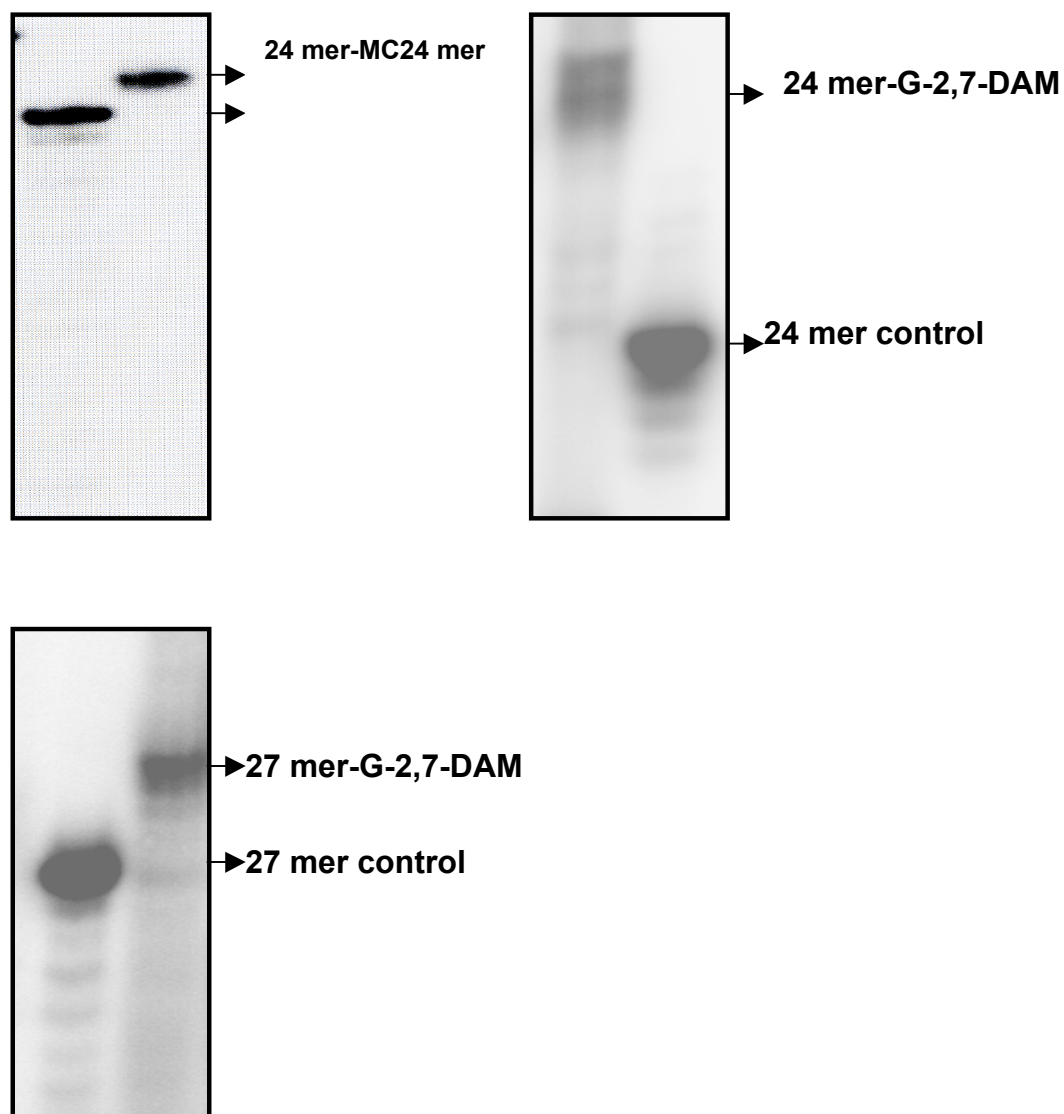

**Fig. S6:** The purity of adducted templates **14-16** was tested by running  $^{32}\text{P}$ -labeled aliquots of each template on a 18% sequencing gel, at 2800 V constant voltage for 3 hours and half. The gel was exposed and processed using a 445SI PhosphorImager and ImageQuant 5.2 software. The abbreviation 24-mer MC24-mer specifies MC adduct **7** in oligonucleotide **14** and 24-mer G-2,7-DAM and 27-mer G-2,7-DAM specify adduct **8** in the oligonucleotides **15** and **16**, respectively.



**Figure S7a.** PAGE analysis of primer extension on 2,7-DAM-adducted (**8**) template of complex **19** by Klenow (exo-) DNA polymerase at 37°.

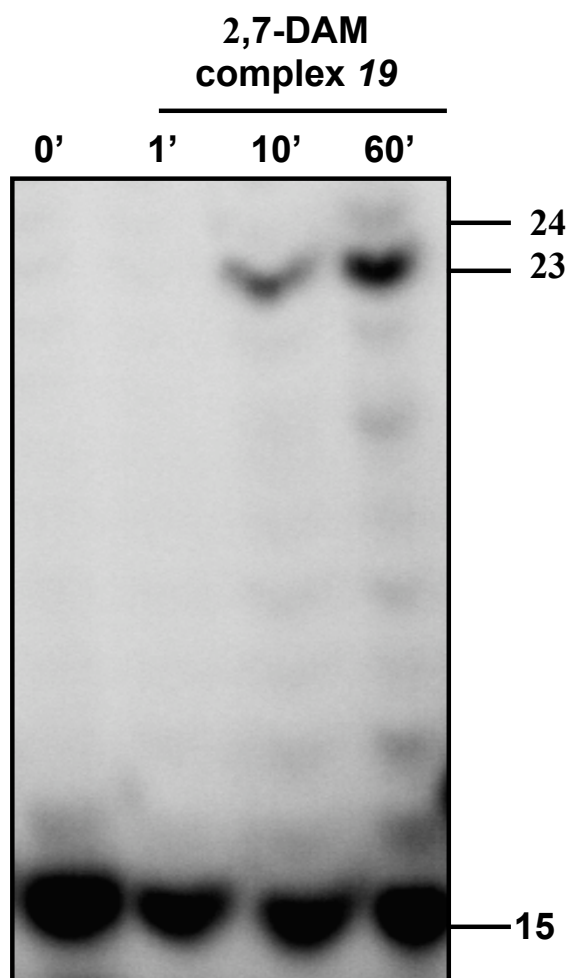

**Figure S7b:** PAGE analysis of primer extension on 2,7-DAM-adducted (**8**) template of complex **18** by T7 (exo-) DNA polymerase.

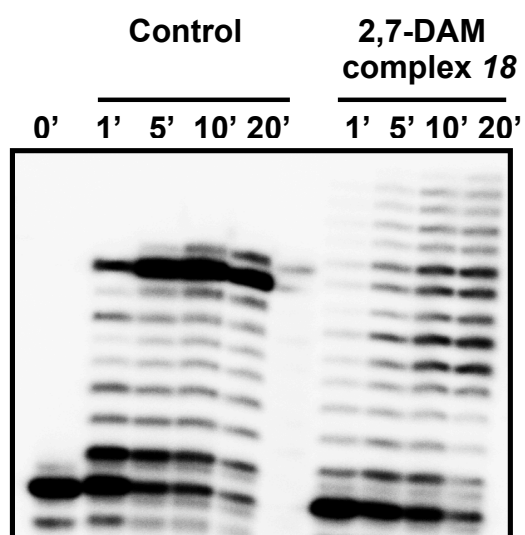

**Figure S8:** PAGE analysis of primer extension on 2,7-DAM-adducted (**8**) template of complex **19** by T7  $\text{exo}^-$ , Klenow  $\text{exo}^-$  and eta DNA polymerases. The translesion synthesis (TLS) were run at 250  $\mu\text{M}$  final concentration of each dNTP, 89 nM final duplex DNA concentration and a substrate to enzyme (S:E) ratio of 3:1, 60 min incubation time.

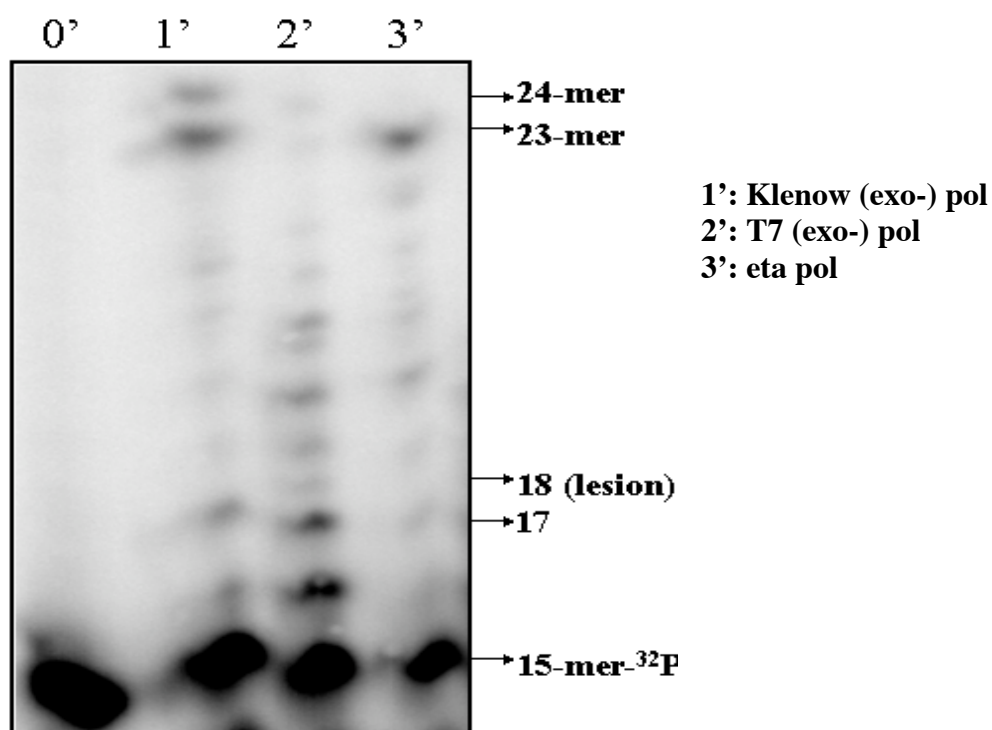

**Table S1:** Mass of oligonucleotides determined by ESIMS.

| <b>oligonucleotide</b>                   | <b>Theoretically<br/>predicted MW<br/>(Da)</b> | <b>Experimentally<br/>determined MW (Da)</b> |
|------------------------------------------|------------------------------------------------|----------------------------------------------|
| 5'-ACACGTCAT                             | 2683                                           | 2682.13                                      |
| 5'- ACACG*(MC)TCAT <b>(10)</b>           | 2985                                           | 2984.48                                      |
| 5'-CTGGTAATTTAC                          | 3634                                           | 3634.90                                      |
| 5'-CTGG*(2,7-DAM)TAATTTAC<br><b>(12)</b> | 3877                                           | 3877.92                                      |
| 5'-CTAGTGGTACC                           | 3636.5                                         | 3635.65                                      |
| 5'-CTAGTGG*(2,7-DAM)TACC <b>(13)</b>     | 3878.68                                        | 3879.68                                      |

**\*mark the position of alkylated guanine.**
